# Supplementary material
Source: PubMed Central journal article supplement (PMC2830002)

# Supporting Information

## Synthesis, magnetic characterization and sensing applications of novel dextran-coated iron oxide nanorods

*Sudip Nath<sup>†</sup>, Charalambos Kaittanis<sup>†,§</sup>, Vasanth Ramachandran<sup>#</sup>, Naresh Dalal<sup>#</sup>,*

*J. Manuel Perez<sup>\*,§,‡</sup>*

<sup>†</sup> Nanoscience Technology Center, § Burnett School of Biomedical Sciences – College of  
Medicine, and

<sup>‡</sup> Department of Chemistry, University of Central Florida, Orlando, FL 32826,

<sup>#</sup> Department of Chemistry and Biochemistry, Florida State University, Tallahassee, FL  
32306

[jmperez@mail.ucf.edu](mailto:jmperez@mail.ucf.edu)

**Supplemental Figure 1:** Photograph of DIONrods suspension stored at 4 °C.

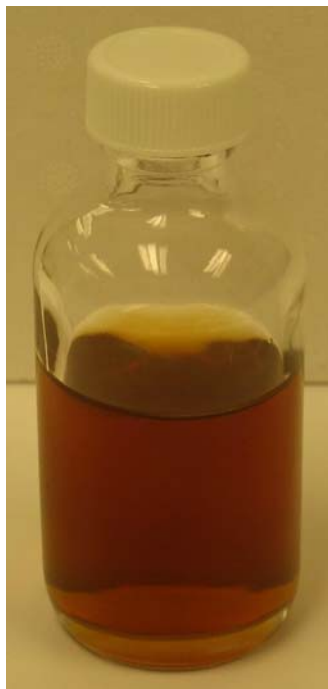

**Supplemental Figure 2:** DLS of the Amersham (a) and Sigma (b) 10-K dextrans, indicating that the Amersham polymer has a narrower distribution, whereas the Fischer polymer has a significant population (13%) with larger diameters. TEM images of dextran-coated iron oxide nanoparticles synthesized with 10-K dextran from either Amersham (c) or Sigma (d).

(a)

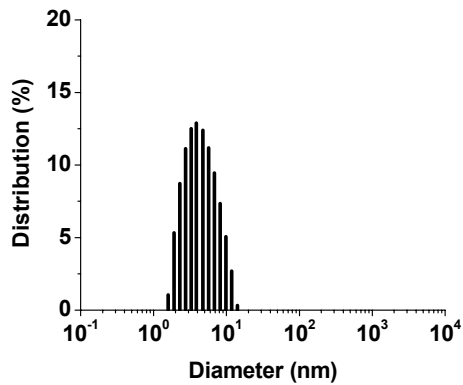

(b)

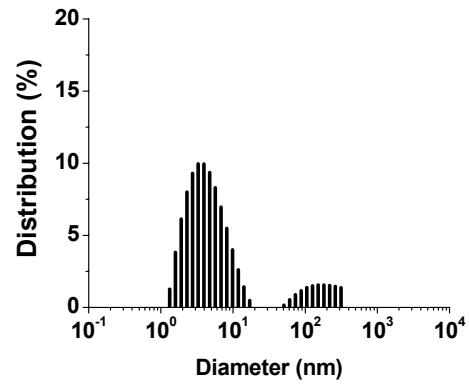

(c)

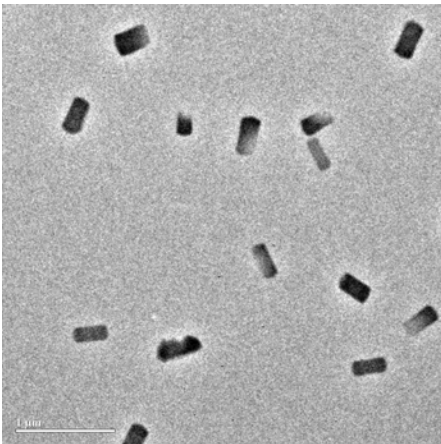

(d)

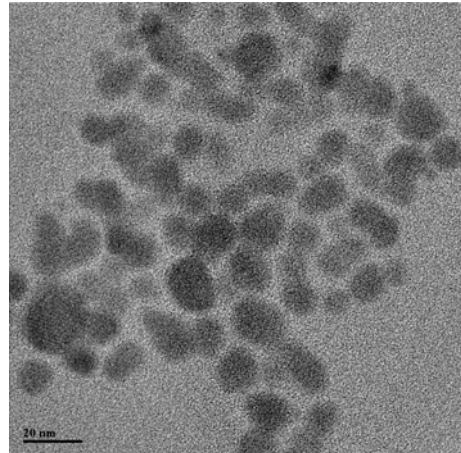

**Supplemental Figure 3:** Kinetics of peroxidase activity of DION particles made from the Sigma 10-K dextran, having TMB as a substrate.

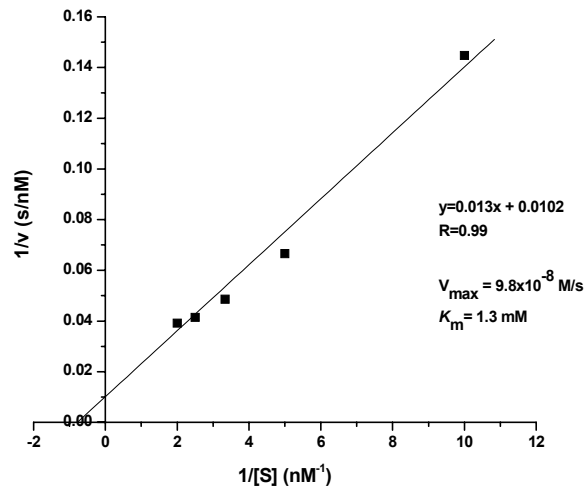

Supplement: NIHMS108634-supplement-1_si_001.pdf [file NIHMS108634-supplement-1_si_001.pdf]
